# Supplementary material for: Uniform nodule-like Ni3C/Ni heterostructure templated by metal–organic frameworks for high-performance overall water splitting
Source: Royal Society of Chemistry journal article supplement (doi:10.1039/d4gc00983e), 2024-01-01
Supplement: d4gc00983e2.pdf [file d4gc00983e2.pdf]

## Supporting Information

### Uniform Nodules-like Ni<sub>3</sub>C/Ni Heterostructure Templated by Metal-organic Frameworks for High-performance Overall Water Splitting

Shumin Wang,<sup>a1</sup> Yi Zhang,<sup>b1</sup> Xiaoyang Deng,<sup>a</sup> Zizai Ma,<sup>cd</sup> Jinping Li,<sup>c</sup> and Xiaoguang Wang<sup>\*ac</sup>

<sup>a</sup> Laboratory of Advanced Materials and Energy Electrochemistry, Institute of New Carbon Materials, College of Material Science and Engineering, Taiyuan University of Technology, Taiyuan, 030024, China

<sup>b</sup> Institute of Carbon-Based Thin Film Electronics, Peking University, Shanxi (ICTFE-PKU), Taiyuan, Taiyuan 030012, China

<sup>c</sup> Shanxi Key Laboratory of Gas Energy Efficient and Clean Utilization, Taiyuan University of Technology, Taiyuan, 030024, China

<sup>d</sup> College of Chemistry, Taiyuan University of Technology, Taiyuan, 030024, China

<sup>1</sup> These authors contributed equally

## Experimental

### 1. Materials

Nickel (II) nitrate hexahydrate ( $\text{Ni}(\text{NO}_3)_2 \cdot 6\text{H}_2\text{O}$ , 98.5%), Formic acid (FA,  $\text{HCOOH}$ , 98.0%) were purchased from Aladdin Industrial Corporation. N, N-dimethylformamide (DMF), acetone, potassium hydroxide (KOH), hydrogen chloride (HCl), acetone and absolute ethanol were purchased from Tianjin Kermel Chemical Reagent Co. Ltd. NF (nickel foam) (void ratio > 98%, ppi: 110) was supplied by Kunshan Jiayisheng Electronics Co. Ltd. Pt/C (20 wt. %),  $\text{RuO}_2$  and Nafion (5 wt. %) were purchased from Sigma-Aldrich. All chemicals purchased were reagent grade and without further purification. Ultrapure water (18.2 M $\Omega$  cm) was obtained using an UPT-II purification system and used in all experiments.

### 2. Synthesis of the samples

#### 2.1. Synthesis of Ni-MOF@NF precursor

Firstly, NF was pretreated with 1.0 M HCl to remove surface impurities, and then rinsed with absolute ethanol and deionized water for several times and dried in a vacuum oven at 50 °C for 30 min. The Ni-MOF@NF precursors were synthesized using hydrothermal method. In a typical process,  $\text{Ni}(\text{NO}_3)_2 \cdot 6\text{H}_2\text{O}$  (1.42 g, 4.875 mmol) and FA (1.25 mL, 32.4 mmol) were dissolved into 20 mL DMF by vigorous stirring for 30 min to acquire a homogenous mixture. Then, the as-prepared solution was transferred into a Teflon-lined stainless steel autoclave with a piece of NF (2×3 cm<sup>2</sup>) and maintained at 100 °C in an oven for 12 h. After cooling naturally, the obtained sample was rinsed with DMF and acetone several times, respectively. Eventually, the obtained product on the surface of NF was dried at 50 °C in a vacuum oven for

2 h, which was denoted as Ni-MOF@NF.

## 2.2. Preparation of Ni<sub>3</sub>C/Ni@NF and other contrast samples

The prepared precursor Ni-MOF@NF was placed in a quartz tube furnace, then annealed at 250 °C for 2 h at a heating rate of 2 °C min<sup>-1</sup> in N<sub>2</sub> atmosphere with total gas flow of 80 mL min<sup>-1</sup>, which was denoted as Ni<sub>3</sub>C/Ni@NF. For morphology and performance comparison, the different calcination time (0.5 h, 2 h and 8 h), were also employed, which were marked as Ni<sub>3</sub>C/Ni@NF-0.5 and Ni<sub>3</sub>C/Ni@NF-8. Moreover, the samples at various calcination temperatures (250 °C, 350 °C, 450 °C and 550 °C), were also fabricated, which were labeled as Ni<sub>3</sub>C/Ni@NF-350, Ni<sub>3</sub>C/Ni@NF-450, Ni<sub>3</sub>C/Ni@NF-550. In addition, the contrast sample under the H<sub>2</sub> gas atmosphere (mixed atmosphere containing 5% H<sub>2</sub> and 95% N<sub>2</sub>), which was marked as Ni@NF. Noted that the mass loading of active materials is ca. 4.0 mg cm<sup>-2</sup>. The samples of Pt/C/NF and RuO<sub>2</sub>/NF were prepared by ink drop coating method. In detail, 5 mg of the Pt/C (20 wt. %) was ultrasonically mixed with isopropyl alcohol (1 mL) and Nafion solution (5 wt. %) (20 μL) to form a well-dispersed catalyst ink. After an ultrasonic treatment for approximately 30 min, the as-obtained suspension ink was deposited on NF with a loading amount equal to the active mass of as-prepared catalysts (4.0 mg cm<sup>-2</sup>) and dried at ambient temperature. The commercial RuO<sub>2</sub>/NF electrode was also made via the same process.

## 2.3. Materials Characterization

The crystalline structure of Ni-MOF@NF precursors and calcinated products were measured by DX-2700 X-ray diffractometer (XRD) equipped with a Cu K $\alpha$  radiation source ( $\lambda=0.154059$  nm) at 40 kV and 30 mA and the diffraction patterns were collected from 5° to

90° at a step size of 0.02°. Thermal gravimetric analysis (TGA) of Ni-MOF powders were carried out using a TG 209 F3 in a nitrogen atmosphere (200 mL min<sup>-1</sup>) in order to determine the optimum calcination temperature. The microstructure of samples was characterized by scanning electron microscopy (SEM, S-4800, Hitachi), transmission electron microscopy (TEM, JEM-2010F) and high-resolution TEM (HRTEM, JEM-2010F). The chemical state and surface composition of samples were analyzed by X-ray photoelectron spectroscopy (XPS, ESCALAB 250) with Al K $\alpha$  radiation at 15 kV and 10 mA. The binding energies (BE) were corrected by referencing the C 1s peak at 284.8 eV. X-ray absorption fine structure (XAFS) spectra were collected using an Easy XES150 system (Easy XAFS LLC, USA) and the obtained data were analyzed by the Athena and hama software. The hard X-ray was monochromatized with a Si (551) crystal monochromator and air-cooled tube with Pd outputting at 25 kV and 2 mA. The Brunauer-Emmett-Teller (BET) surface areas were measured using nitrogen adsorption isotherms at 77 K (3H-2000 PM2). The corresponding pore size distribution was calculated from the adsorption branches of isotherms via the Barrett-Joyner-Halenda method. The contact angles were tested by a SL200B analyzer (Solon Tech. (Shanghai) Co., Ltd.) to evaluate the surface wettability. When the 2  $\mu$ L of 1.0 M KOH solution was dropped on the sample surface, the equipped camera system would capture a photo to determine the contact angle. Raman spectra analysis (LabRam HR Evolution,  $\lambda$  = 532 nm) was adopted to distinguish the characteristic vibrational modes of the synthesized materials. In all tests, only the SEM and contact angles test is performed for the total Ni<sub>3</sub>C/Ni@NF electrode. For the SEM and contact angles tests, the samples grown on NF was characterized to observe the specific morphology. For the other tests (including XRD, TEM, XPS, XAFS, BET and Raman spectra), the Ni<sub>3</sub>C/Ni

powders were carefully scraped off from the surface of Ni<sub>3</sub>C/Ni@NF sample.

## 2.4. Electrochemical measurements

All the electrochemical measurements were carried out in alkali solution (1.0 M KOH) on a CS-350 electrochemical workstation at a typical three-electrode system equipped with a high-purity graphite rod as counter electrode, a Hg/HgO (1.0 M KOH) as reference electrode, and as-prepared samples as working electrode, respectively. Meanwhile, the catalytic performance of pristine Ni foam was also estimated as the cathode and anode. Before each electrochemical measurement, the electrolytes were deaerated by bubbling of N<sub>2</sub> for 30 min to avoid any possible occurrence of oxygen reduction. Before evaluating the HER and OER activity, all catalysts were activated by 20 cyclic voltammetry (CV) cycles across the potential window at a scan rate of 20 mV s<sup>-1</sup> to reach a steady state. The linear-sweep voltammetry (LSV) were performed at a scan rate of 5 mV s<sup>-1</sup> for HER and 2 mV s<sup>-1</sup> for OER in 1.0 M KOH solution with 80% iR compensation.<sup>1</sup> All tested potentials were normalized to reversible hydrogen electrode (RHE) via the Nernst equation (1):

$$E(\text{RHE}) = E(\text{Hg/HgO}) + 0.098 + 0.059 \times \text{pH} - 80\%iR_s \quad (1)$$

where E (RHE) is the potential vs. RHE, E (Hg/HgO) is the tested potential, and R<sub>s</sub> is solution resistance.

The Tafel plots were calculated based on the equation (2):

$$\eta = b \log j + a \quad (2)$$

Where  $\eta$ ,  $b$  and  $j$  are the overpotential, Tafel slope and current density, respectively.

Electrochemical impedance spectra (EIS) were performed in the frequency range from 0.1 Hz

to 100 kHz at potentials of  $-0.066$  V (vs. RHE) for HER and  $1.574$  V (vs. RHE) for OER with a  $10$  mV sinusoidal perturbation. Furthermore, to evaluate the electrochemical surface area (ECSA) of these electrodes, double-layer capacitance measurements ( $C_{dl}$ ) were carried out in the potential region from  $0.054$  V to  $0.154$  V (vs. RHE) for HER performance and  $0.924$  V to  $1.024$  V (vs. RHE) for OER performance without faradaic process from the CV curves at different scan rates ( $20, 40, 60, 80, 100$  and  $120$   $\text{mV s}^{-1}$ ). The corresponding specific  $C_{dl}$  values were obtained by calculating the slope by plotting  $\Delta j$  vs. scan rates where  $\Delta j = |j_{anode} - j_{cathode}|/2$ .<sup>2</sup> In general, the ECSA is calculated based on the following equation (3):

$$\text{ECSA} = \frac{C_{dl}}{C_s} \quad (3)$$

Where  $C_s$  is the specific capacitance of the sample or the capacitance of an atomically smooth planar surface of the material per unit area under identical electrolyte conditions. Generally, due to the specific capacitance of atomically smooth planar surface with a real surface area of  $1.0$   $\text{cm}^2$ , the specific capacitance ( $C_s$ ) is calculated within  $20$ - $60$   $\mu\text{F cm}^{-2}$  in alkaline media. In this study,  $40$   $\mu\text{F cm}^{-2}$  is used as the general specific capacitance of  $C_s$  in  $1.0$  M alkaline media reported in many previous literatures.<sup>3, 4</sup> In addition, the Faradaic efficiency (FE) was determined by monitoring gases evolution ( $\text{H}_2$  and  $\text{O}_2$ ) under the current density of  $10$   $\text{mA cm}^{-2}$  in a sealed electrolytic cell. In detail, the amount of generated gases during bulk electrolysis was quantified by gas chromatography (GC, 8860 GC System, carrier gas: Ar; chromatographic column:  $5$  Å molecular sieve column; detector: TCD). Before each measurement, the electrolyte was bubbled with Ar for  $30$  min.

In order to investigate the effect of ECSA on the electrocatalytic performance, the HER and OER curves were normalized by ECSAs. The ECSA-normalized current density for the catalysts was calculated by the following equation:

$$\text{Current density}_{\text{ECSA}} = j \times C_s / C_{dl} \quad (4)$$

## 2.5. DFT calculations

The theoretical calculations were performed via density functional theory (DFT) by the Vienna Ab-initio Simulation Package (VASP).<sup>5</sup> In this work, the core and valence electrons were represented by the projector augmented wave (PAW) method and plane-wave basis functions with a kinetic energy cut-off of 450 eV. The convergence threshold for structural optimization was set as  $10^{-5}$  eV in energy and  $-0.05$  eV in force. In this work, the Brillouin zone was sampled with the Monkhorst-Pack scheme. Monkhorst-Pack k-point setups were  $3 \times 3 \times 3$  and  $3 \times 3 \times 1$  for bulk and slab geometry optimization, respectively.

The hydrogen adsorption Gibbs free energy  $\Delta G_H$  can be achieved as follows:

$$\Delta G_H = \Delta E_H + \Delta ZPE - T\Delta S_H \quad (5)$$

Where  $\Delta E_H$  represents the adsorption energy of H.  $\Delta ZPE$  and  $T\Delta S_H$  represent the difference of the zero-point energy and entropy between the hydrogen adsorbed state and the gas phase  $H_2$ . Moreover, the overall contribution can be rewritten as:

$$\Delta G_H = \Delta E_H + 0.24 = E_{(\text{surf} + \text{H})} - E_{(\text{surf})} - 1/2 E_{(\text{H}_2)} + 0.24 \quad (6)$$

The OER performance of the catalysts was determined by the relative energy of the intermediates OH, O, OOH and  $O_2$  in alkaline environments:

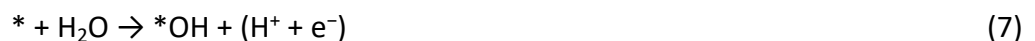

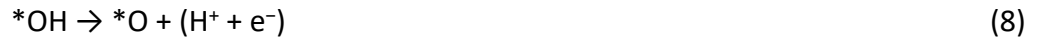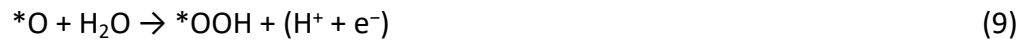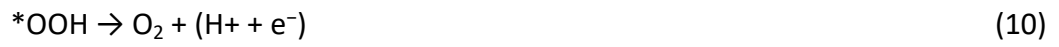

where \* represents adsorption sites. The relative energy of each step is obtained by

$$\text{Relative energy} = \Delta E_H + \Delta ZPE - T\Delta S \quad (11)$$

where  $\Delta E_H$  is the calculated total energy difference,  $\Delta ZPE$  and  $T\Delta S$  is zero-point energy correction and entropy difference, respectively.



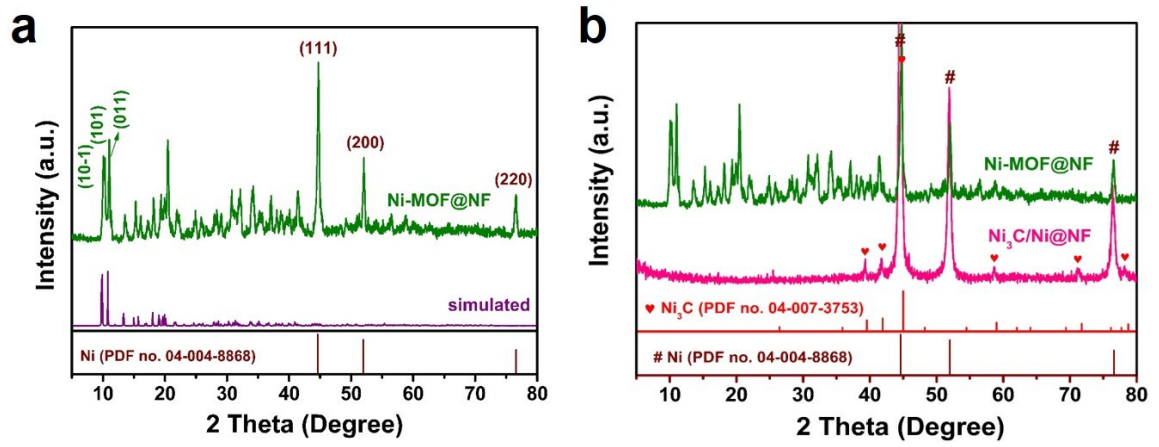

**Fig. S1.** XRD patterns of (a) Ni-MOF@NF precursor and (b) Comparison of Ni<sub>3</sub>C/Ni@NF and Ni-MOF@NF precursor.

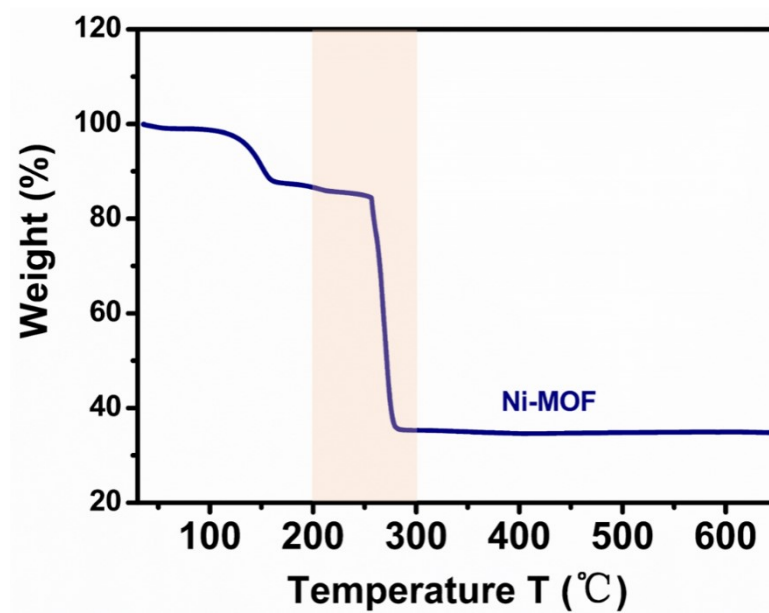

**Fig. S2.** Thermogravimetric analysis (TGA) of Ni-MOF in nitrogen atmosphere.

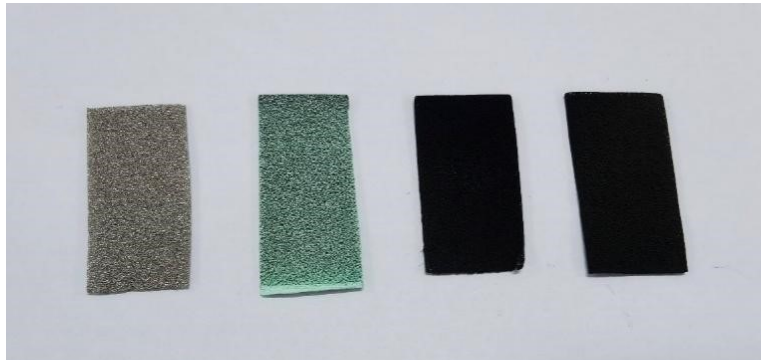

**Fig. S3.** Photographs of the samples. From left to right: bare NF, Ni-MOF@NF precursor, Ni<sub>3</sub>C/Ni@NF and Ni@NF.

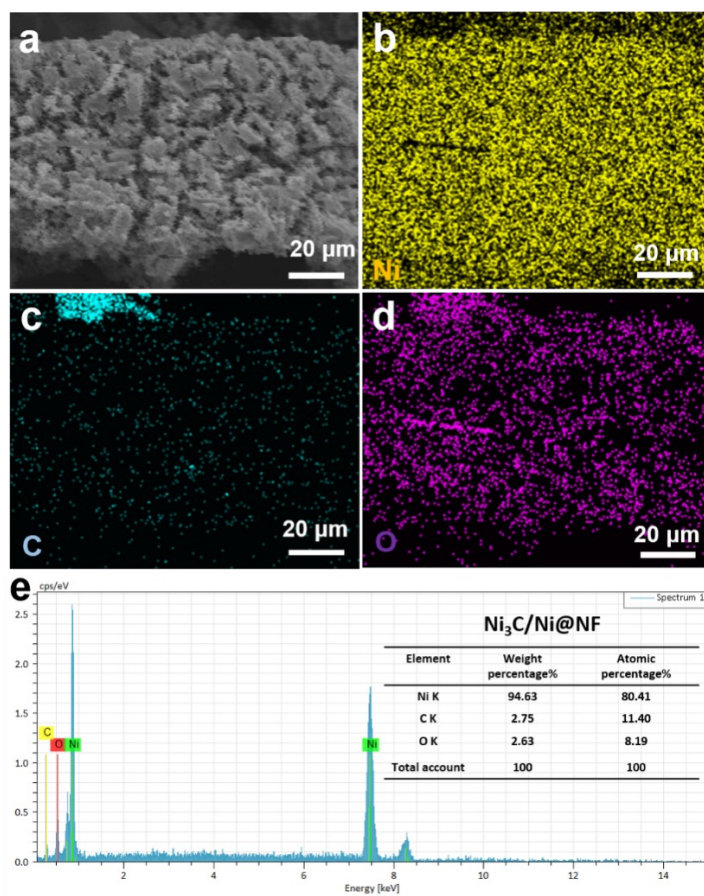

**Fig. S4.** EDX mapping and elemental analysis of  $\text{Ni}_3\text{C}/\text{Ni@NF}$ .

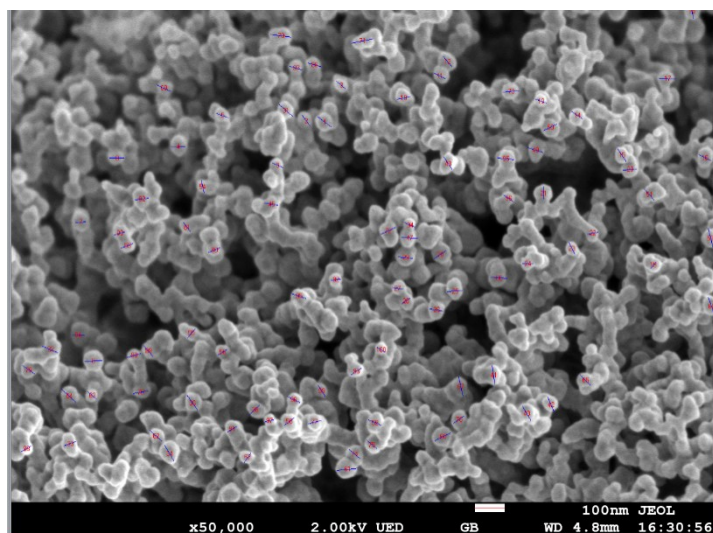

**Fig. S5.** SEM image for standardization of particle size of  $\text{Ni}_3\text{C}/\text{Ni}@\text{NF}$ .

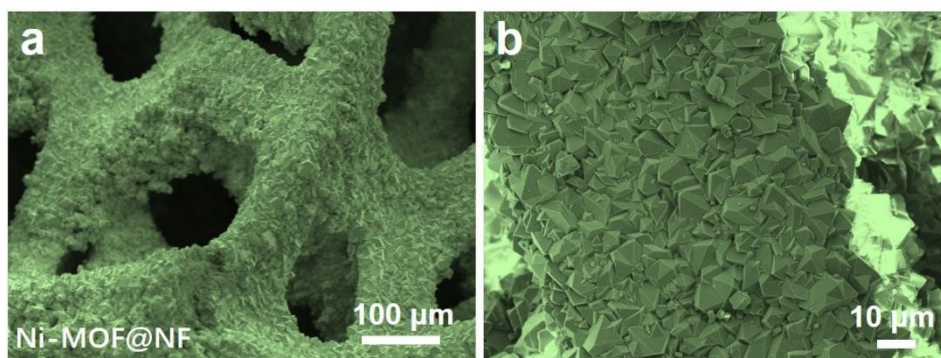

**Fig. S6.** SEM images of Ni-MOF@NF precursor.

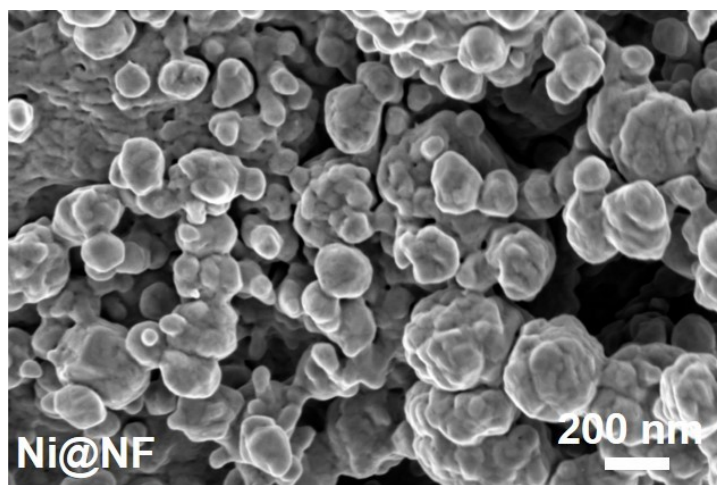

**Fig. S7.** SEM images of Ni@NF.

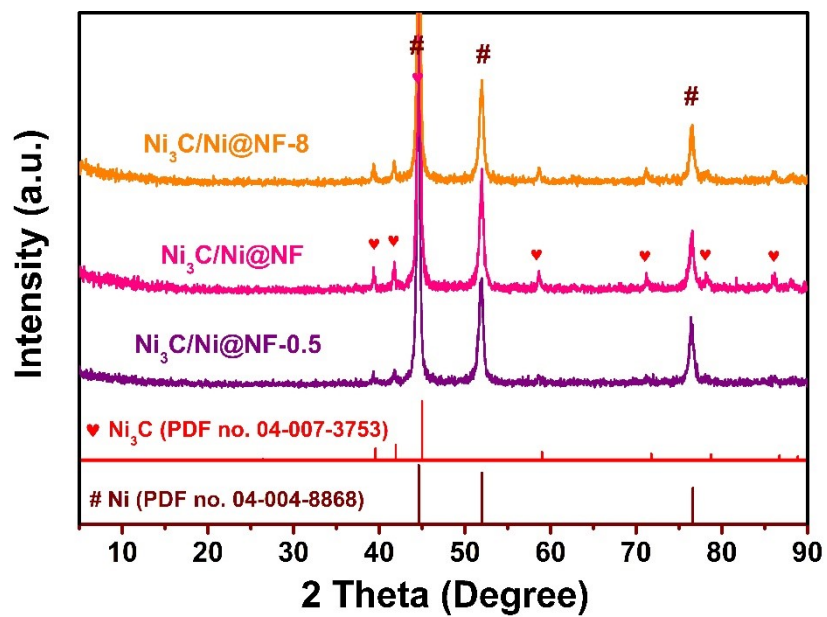

**Fig. S8.** XRD patterns of the calcinated product of Ni-MOF@NF at 250 °C in nitrogen for different time (0.5, 2 and 8 h).



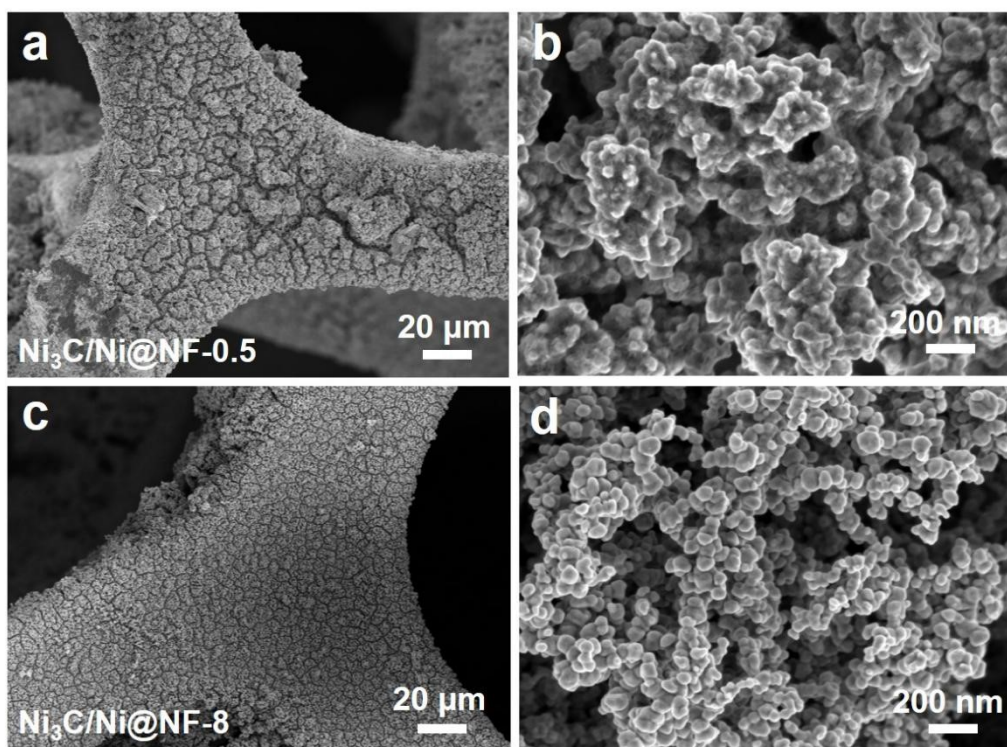

**Fig. S9.** SEM images of the calcinated products. (a, b)  $\text{Ni}_3\text{C}/\text{Ni}@\text{NF}-0.5$  and (c, d)  $\text{Ni}_3\text{C}/\text{Ni}@\text{NF}-8$ .

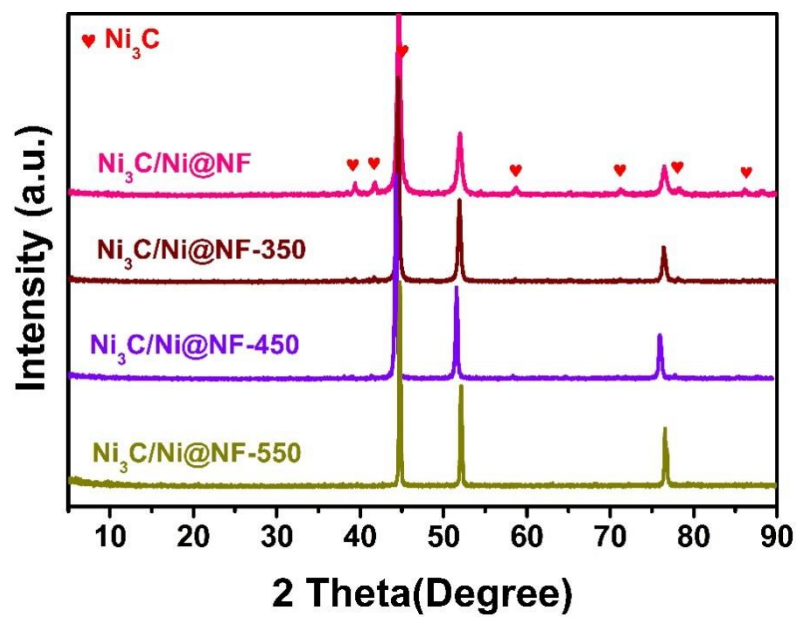

**Fig. S10.** XRD patterns of the calcinated products of Ni-MOF@NF in nitrogen for 2 h at different temperatures (250, 350, 450 and 550 °C).

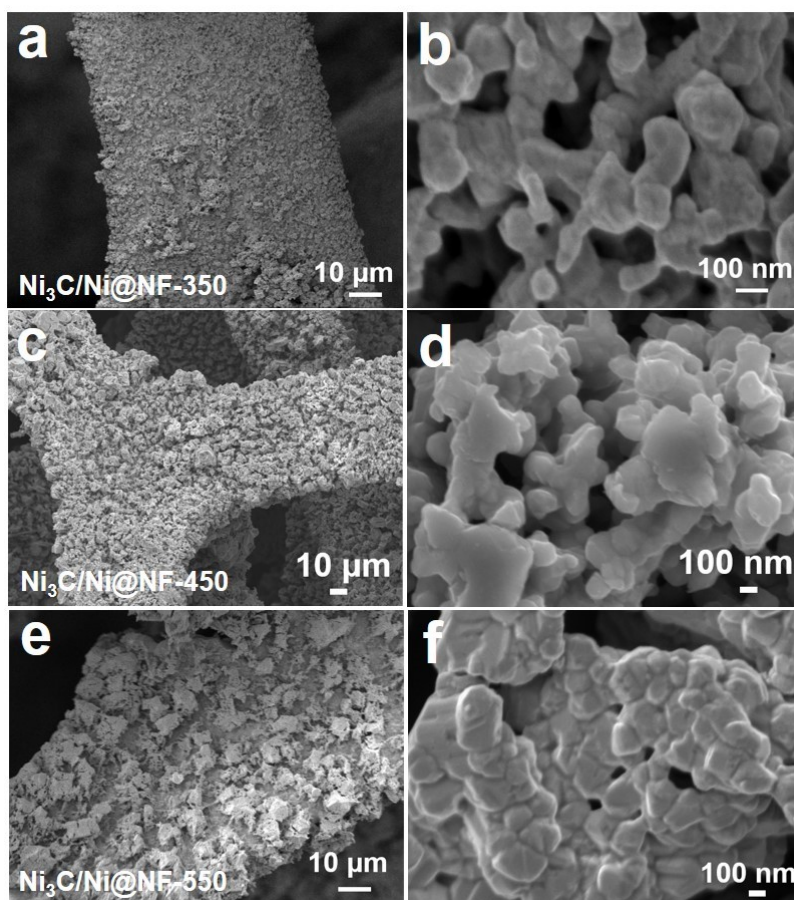

**Fig. S11.** SEM images of the calcinated products. (a, b) Ni<sub>3</sub>C/Ni@NF-350. (c, d) Ni<sub>3</sub>C/Ni@NF-450. (e, f) Ni<sub>3</sub>C/Ni@NF-550.

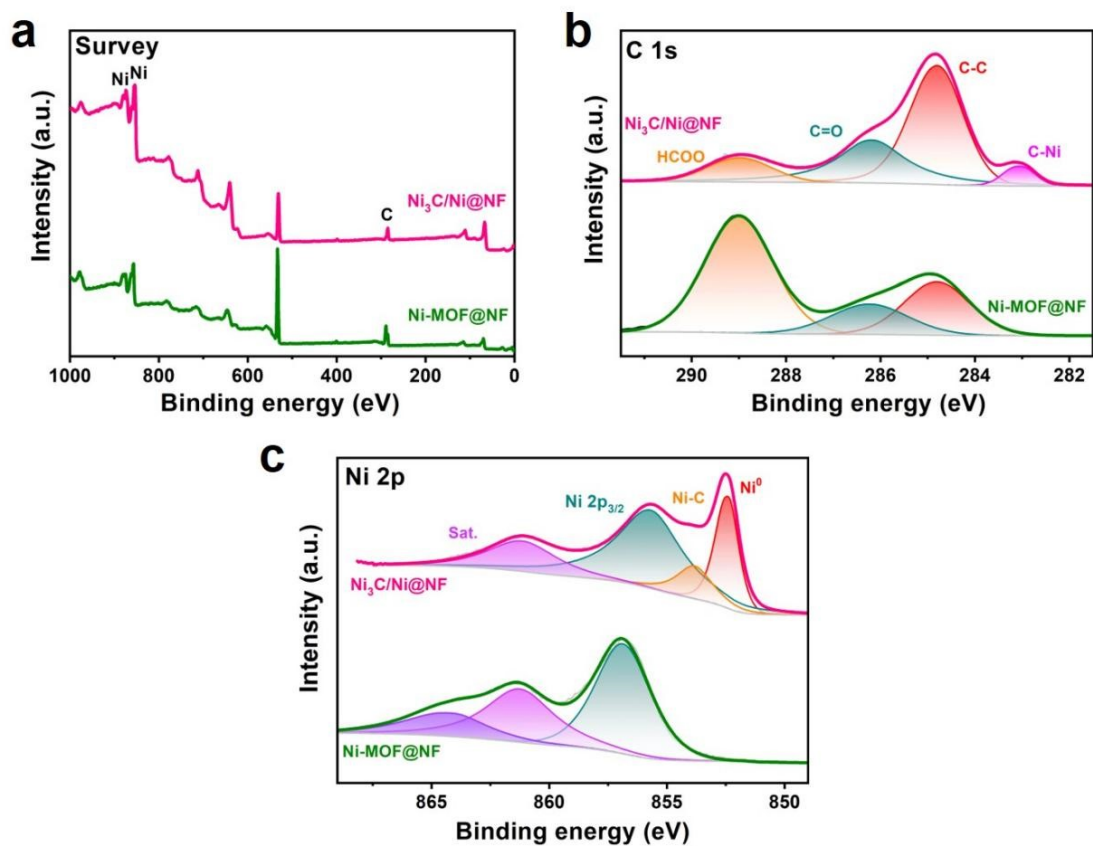

**Fig. S12.** XPS spectra for  $\text{Ni}_3\text{C}/\text{Ni@NF}$  and  $\text{Ni-MOF@NF}$  precursor scraped from Ni foam. (a) XPS survey. (b) C1s and (c) Ni 2p region.

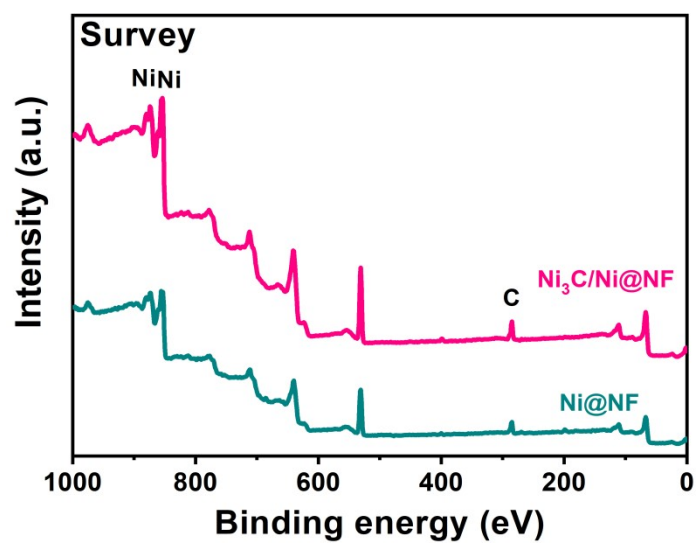

**Fig. S13.** Survey XPS spectra of  $\text{Ni}_3\text{C}/\text{Ni@NF}$  and  $\text{Ni@NF}$ .

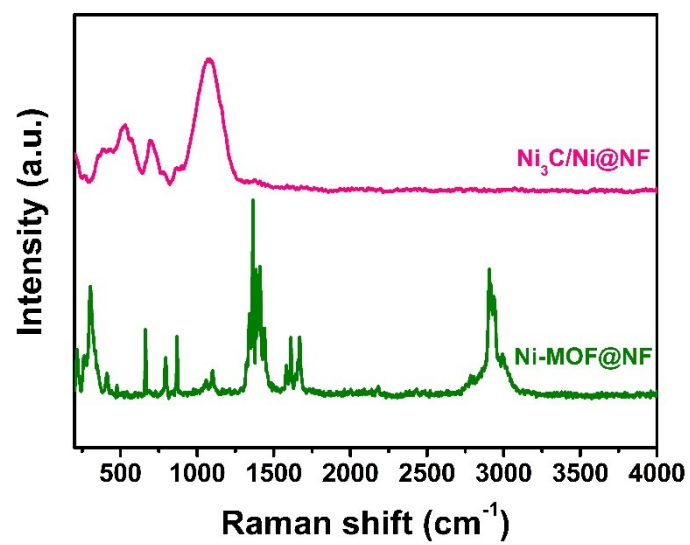

**Fig. S14.** Raman spectra of Ni<sub>3</sub>C/Ni@NF and Ni-MOF@NF precursor.

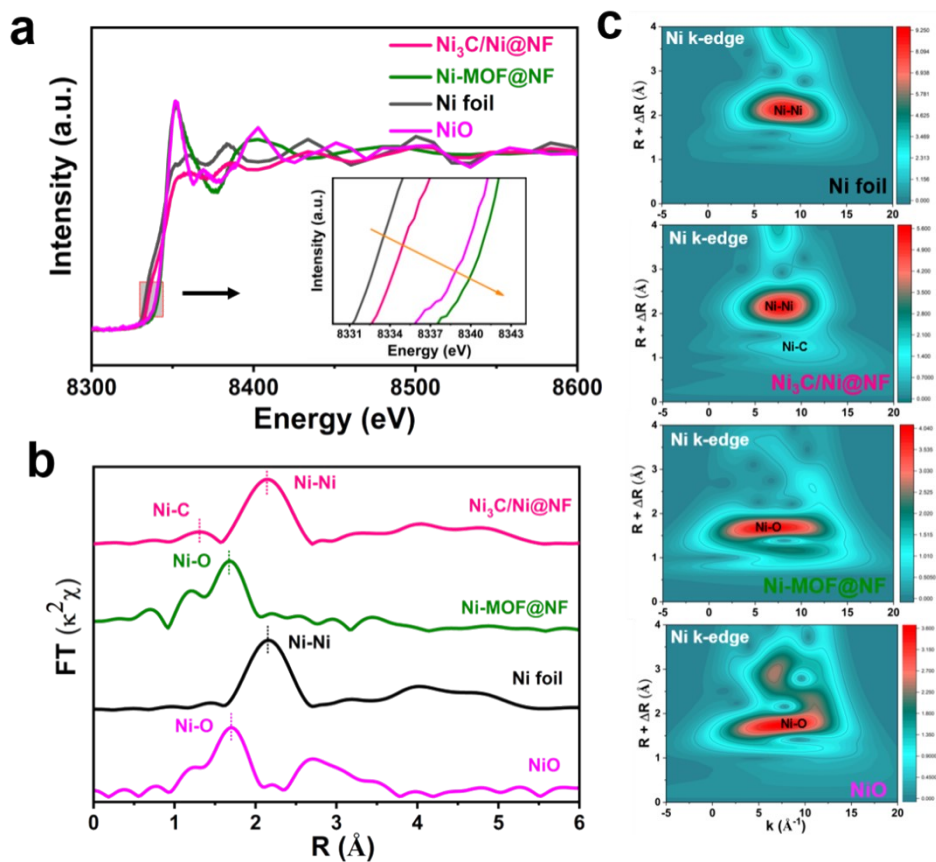

**Fig. S15.** (a) The normalized Ni K-edge XANES spectra. (b) Corresponding FT-EXAFS spectra. (c) WT contour plots of Ni K-edge at R space of  $\text{Ni}_3\text{C}/\text{Ni@NF}$ ,  $\text{Ni-MOF@NF}$ , Ni foil and NiO.

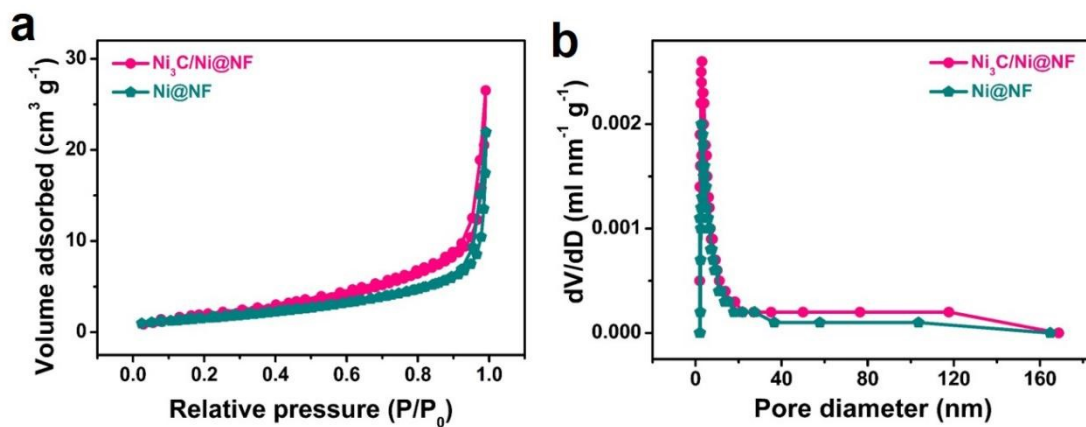

**Fig. S16.** (a)  $\text{N}_2$  adsorption/desorption isotherms and (b) pore size distribution of  $\text{Ni}_3\text{C}/\text{Ni@NF}$  and  $\text{Ni@NF}$ .



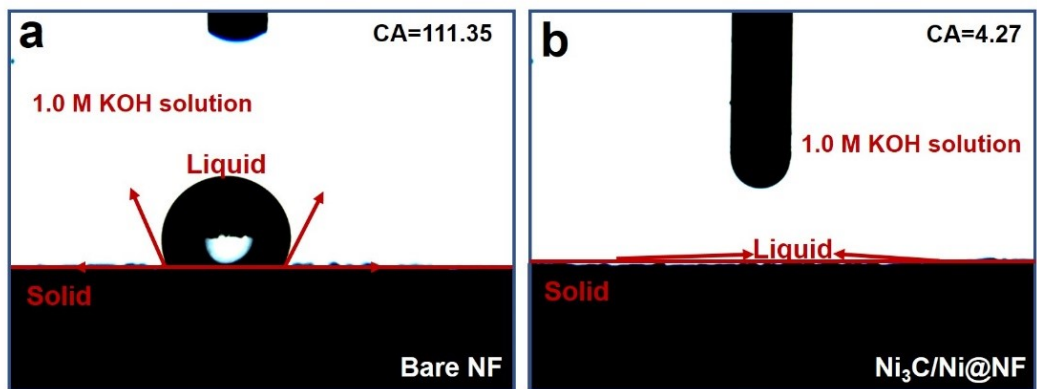

**Fig. S17.** Contact angles of (a) bare NF and (h) Ni<sub>3</sub>C/Ni@NF.

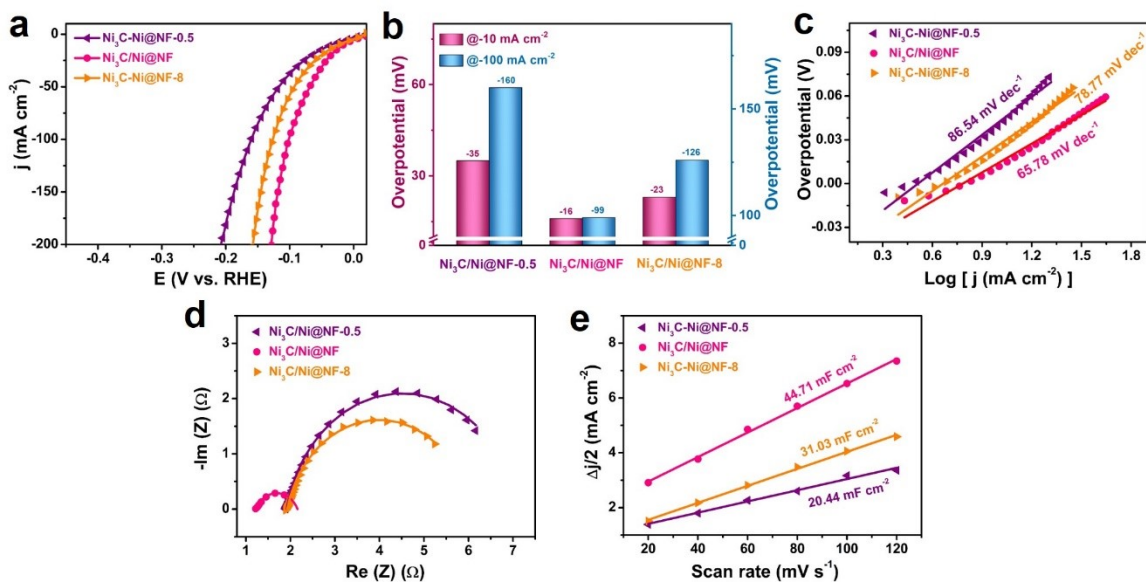

**Fig. S18.** (a) HER polarization curves of as-prepared catalysts with different calcination time (Ni<sub>3</sub>C/Ni@NF-0.5, Ni<sub>3</sub>C/Ni@NF and Ni<sub>3</sub>C/Ni@NF-8). (b) Bar graph of overpotentials ( $\eta$ ) at 10 and 100 mA cm<sup>-2</sup>. (c) Tafel plots. (d) Nyquist plots. Scatters: experimental data; lines: fitted curves. (e) C<sub>dl</sub> plots.

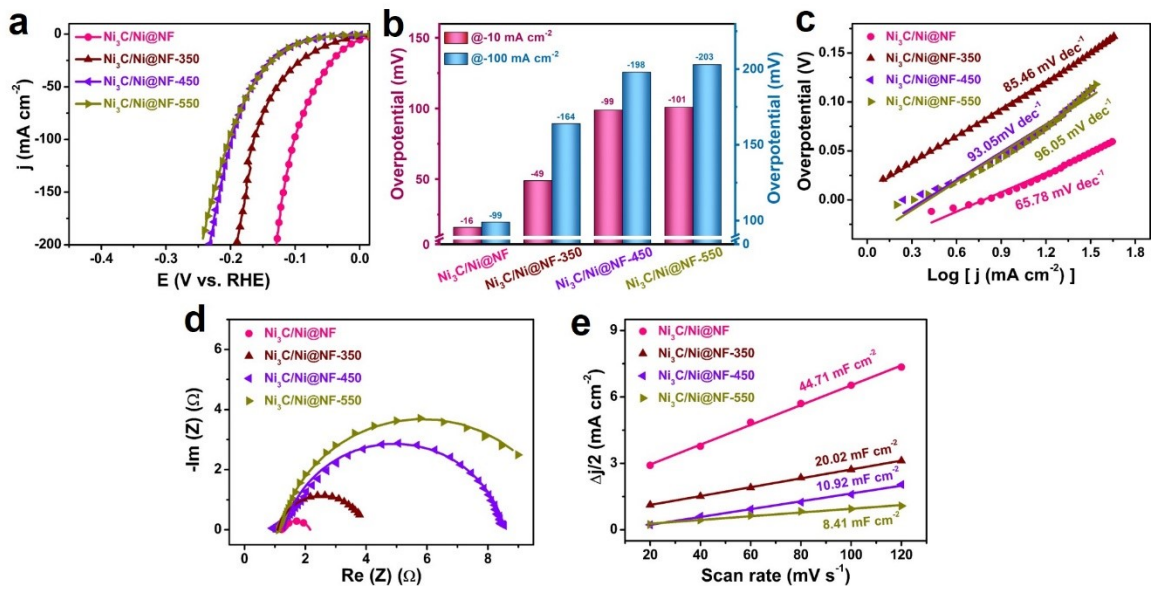

**Fig. S19.** (a) HER polarization curves of as-prepared catalysts at different calcination temperatures (Ni<sub>3</sub>C/Ni@NF, Ni<sub>3</sub>C/Ni@NF-350, Ni<sub>3</sub>C/Ni@NF-450 and Ni<sub>3</sub>C/Ni@NF-550). (b) Bar graph of overpotentials ( $\eta$ ) at 10 and 100 mA cm<sup>-2</sup>. (c) Tafel plots. (d) Nyquist plots. Scatters: experimental data; lines: fitted curves. (e) C<sub>dl</sub> plots.

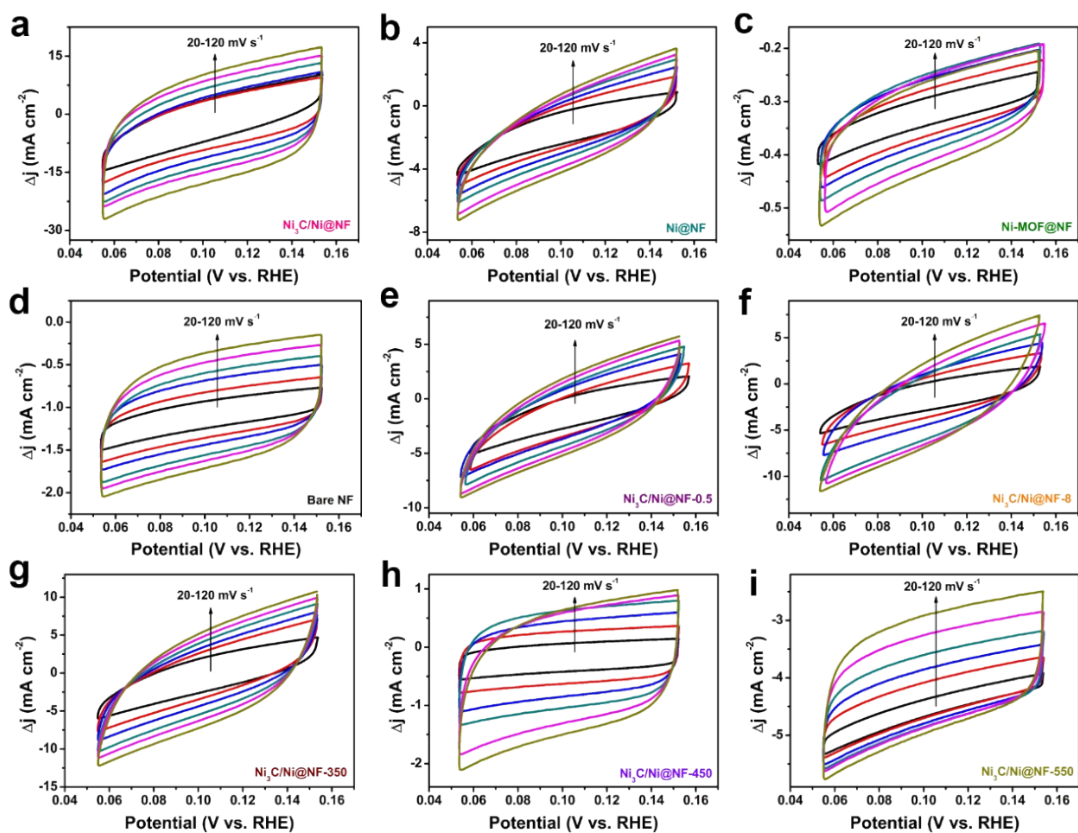

**Fig. S20.** Cyclic voltammograms of catalysts at different scan rates from  $20 \text{ mV s}^{-1}$  to  $120 \text{ mV s}^{-1}$  in  $1.0 \text{ M KOH}$  for HER.

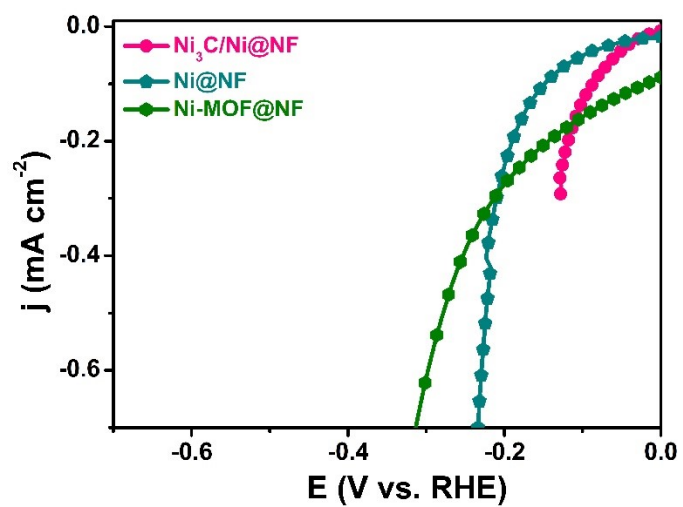

**Fig. S21.** ECSA-normalized LSV curves for Ni<sub>3</sub>C/Ni@NF, Ni@NF and Ni-MOF@NF toward the HER.

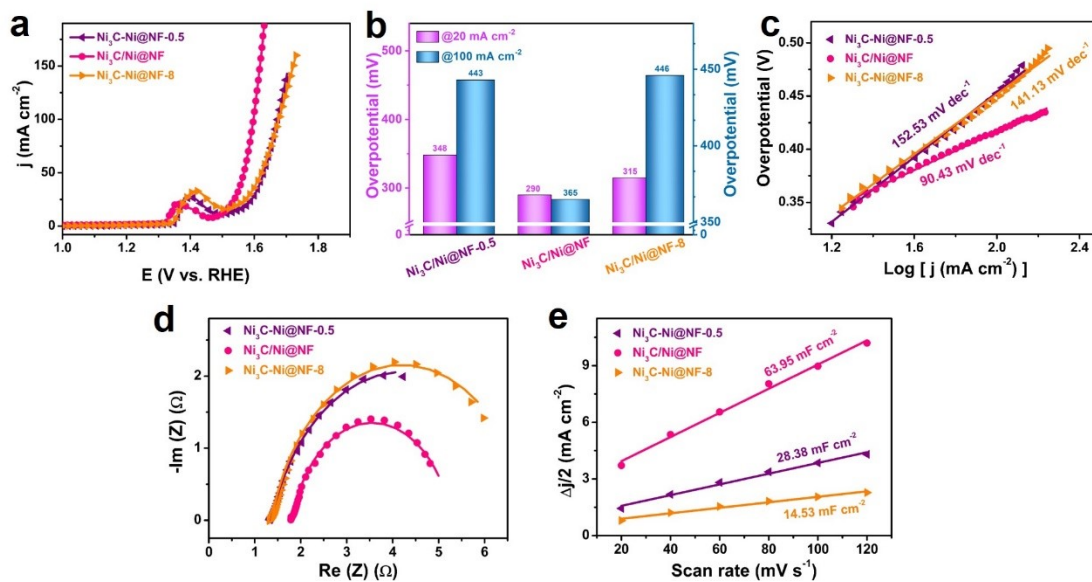

**Fig. S22.** (a) OER polarization curves of as-prepared catalysts with different calcination time (Ni<sub>3</sub>C/Ni@NF-0.5, Ni<sub>3</sub>C/Ni@NF and Ni<sub>3</sub>C/Ni@NF-8). (b) Bar graph of the overpotentials ( $\eta$ ) at 20 and 100 mA cm<sup>-2</sup>. (c) Tafel plots. (d) Nyquist plots. Scatters: experimental data; lines: fitted curves. (e)  $C_{dl}$  plots.

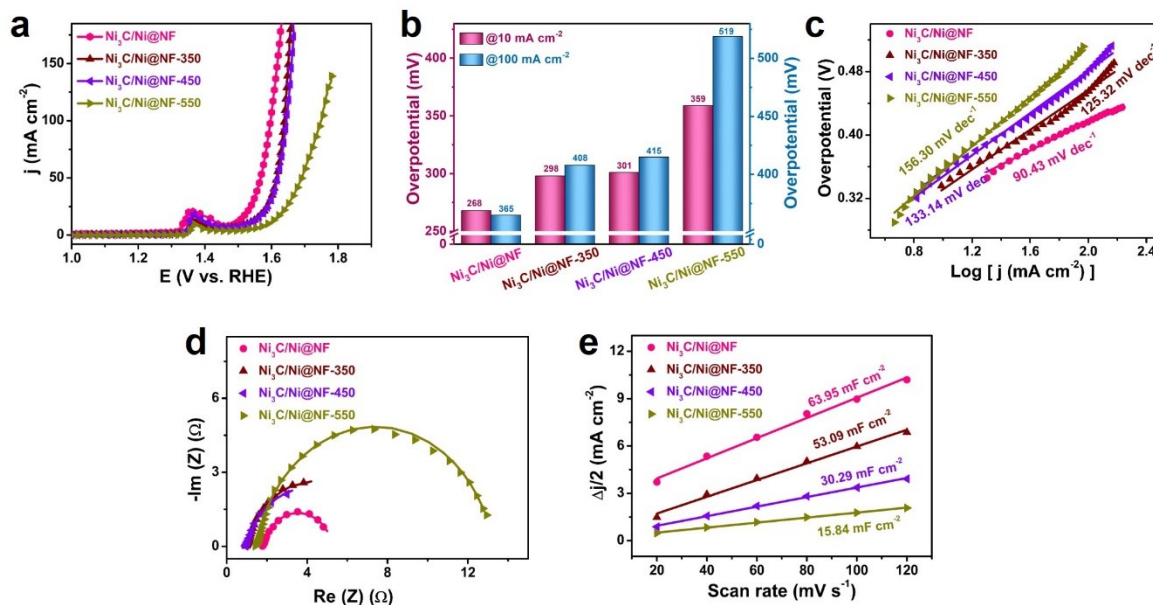

**Fig. S23.** (a) OER polarization curves of as-prepared catalysts at different calcination temperatures (Ni<sub>3</sub>C/Ni@NF, Ni<sub>3</sub>C/Ni@NF-350, Ni<sub>3</sub>C/Ni@NF-450 and Ni<sub>3</sub>C/Ni@NF-550). (b) Bar graph of the overpotentials ( $\eta$ ) at 10 and 100 mA cm<sup>-2</sup>. (c) Tafel plots. (d) Nyquist plots. Scatters: experimental data; lines: fitted curves. (e) C<sub>dl</sub> plots.

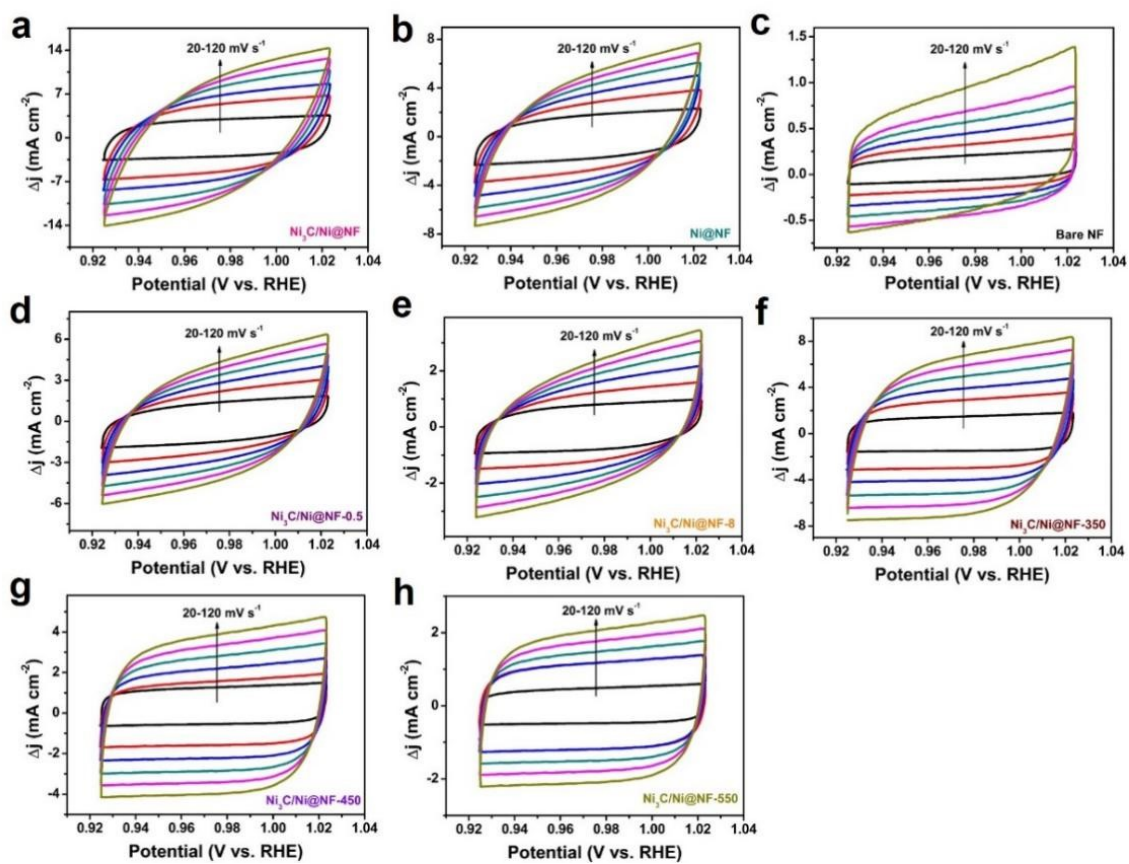

**Fig. S24.** Cyclic voltammograms of catalysts at different scan rates from 20  $\text{mV s}^{-1}$  to 120  $\text{mV s}^{-1}$  in 1.0 M KOH for OER.



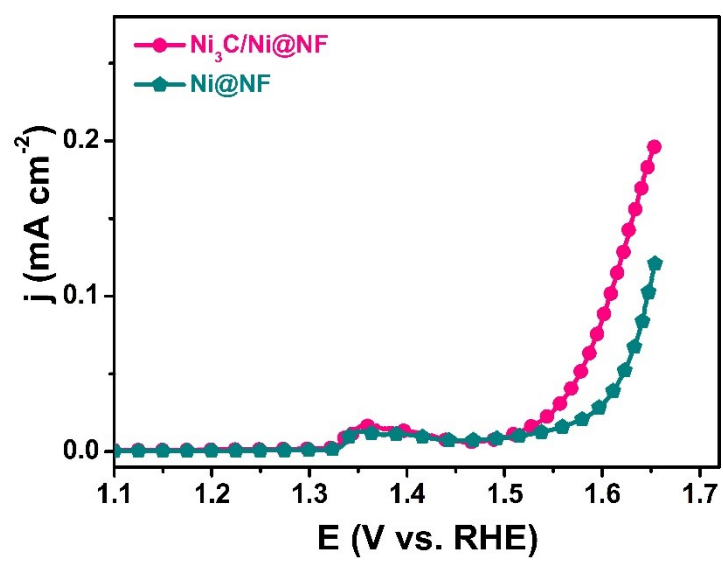

**Fig. S25.** ECSA-normalized LSV curves for Ni<sub>3</sub>C/Ni@NF and Ni@NF toward the OER.

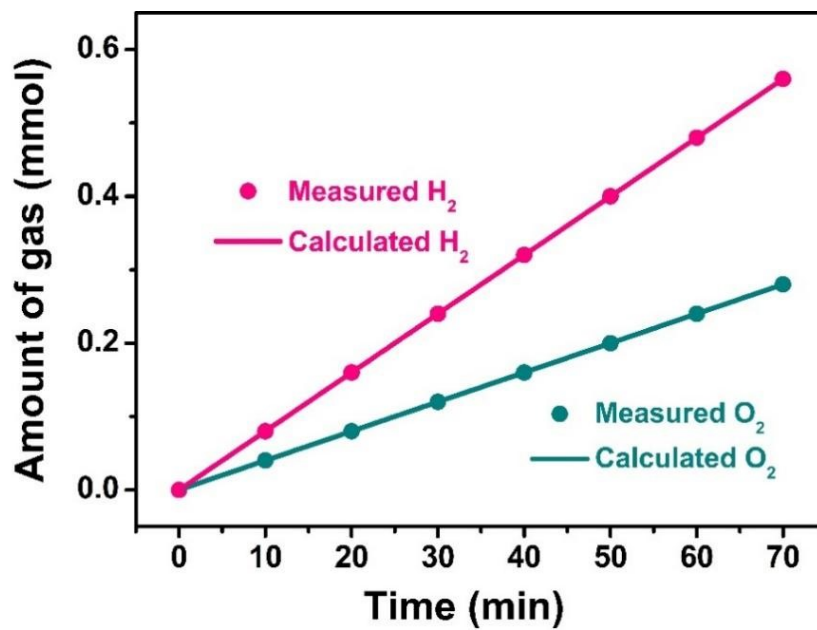

**Fig. S26.** The amount of gas theoretically calculated and experimentally measured versus time for Ni<sub>3</sub>C/Ni@NF.

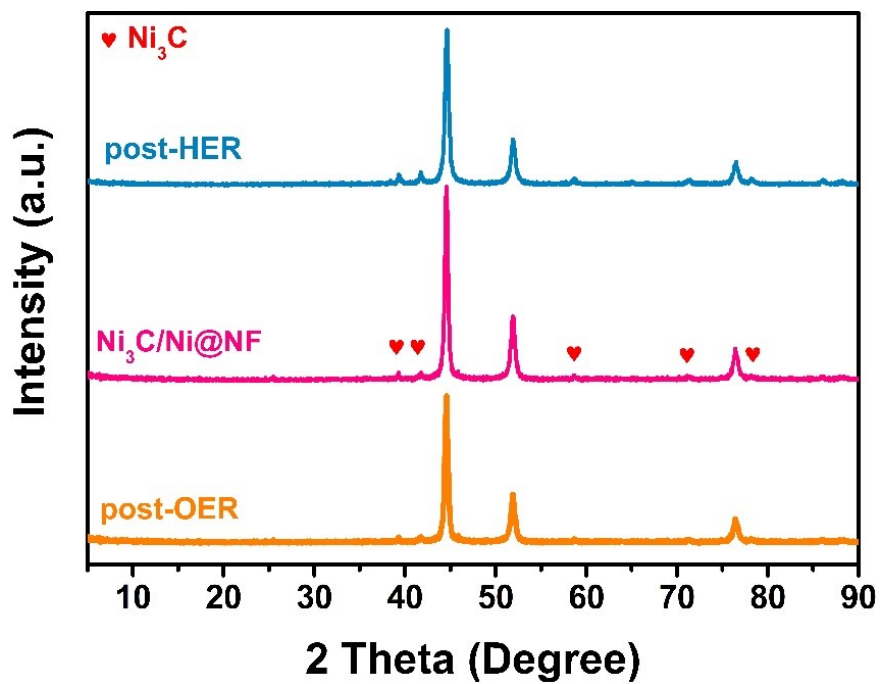

**Fig. S27.** XRD for the initial Ni<sub>3</sub>C/Ni@NF, post-HER and post-OER samples scraped from Ni foam.

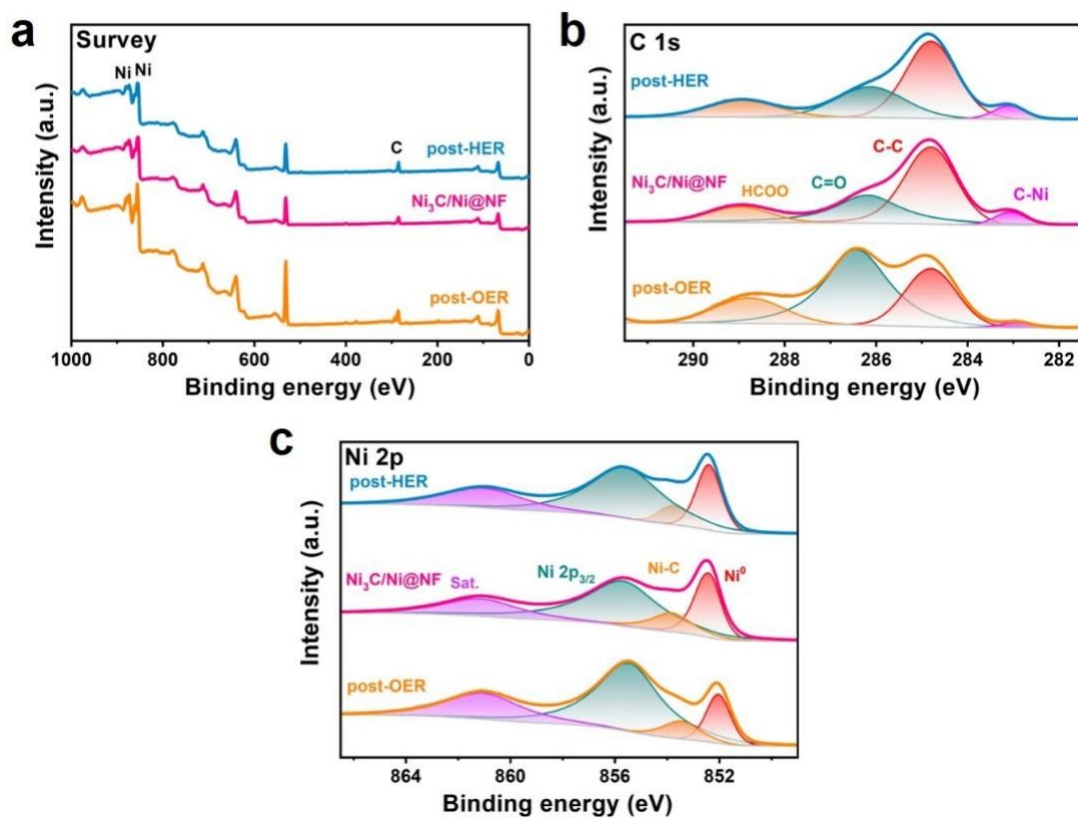

**Fig. S28.** XPS spectra for initial Ni<sub>3</sub>C/Ni@NF, post-HER and post-OER samples scraped from Ni foam. (a) XPS survey. (b) C 1s and (c) Ni 2p region.

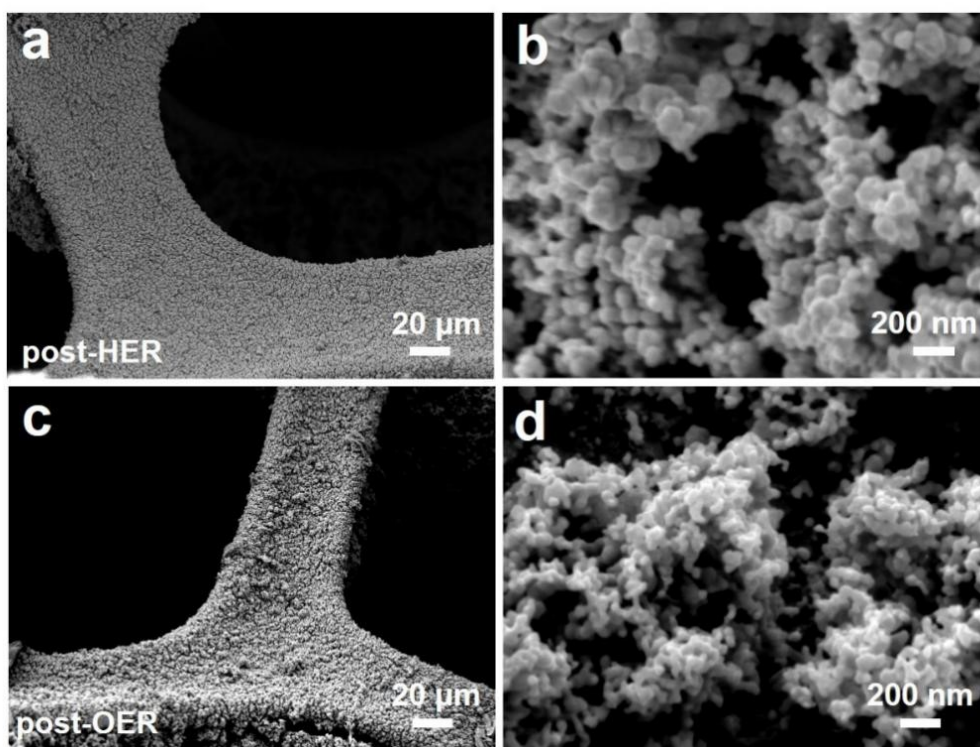

**Fig. S29.** SEM images for (a, b) post-HER and (c, d) post-OER samples for  $\text{Ni}_3\text{C}/\text{Ni}@\text{NF}$ .

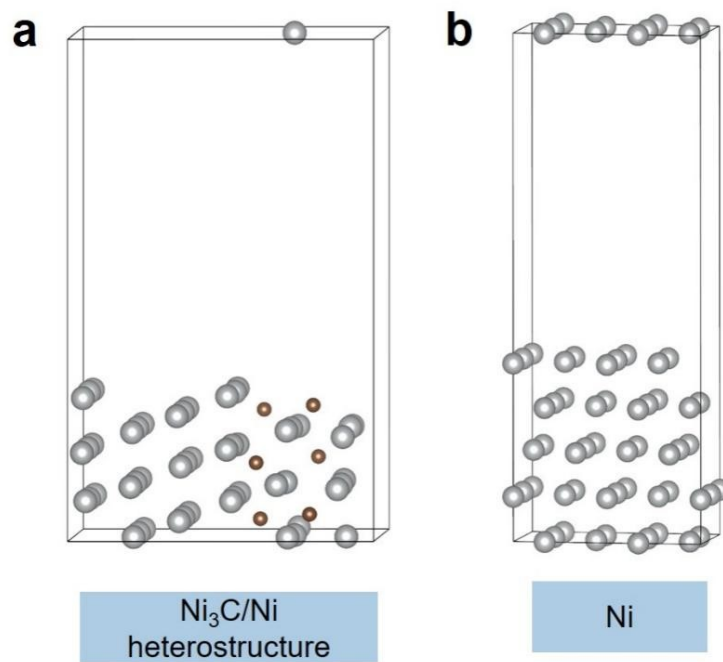

**Fig. S30.** Models of (a)  $\text{Ni}_3\text{C}/\text{Ni}$  heterostructure and (b) Ni.

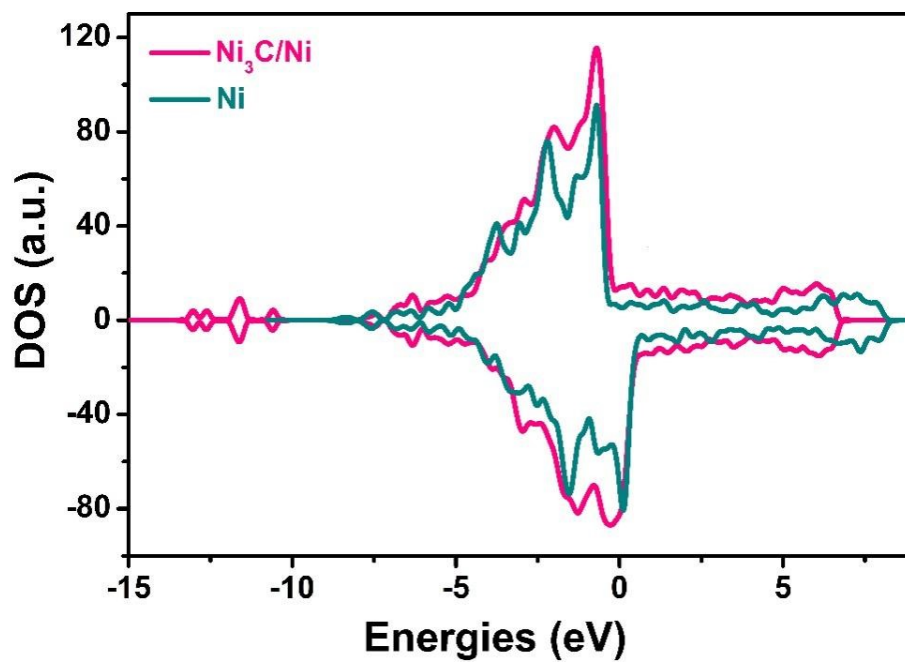

**Fig. S31.** Total density of states (DOS) of  $\text{Ni}_3\text{C}/\text{Ni}$  and  $\text{Ni}$ .

**Table S1.** Comparison of Tafel slope and required overpotential at current density of 10 mA cm<sup>-2</sup> ( $\eta_{10}$ ) for Ni<sub>3</sub>C/Ni@NF with many of reported state-of-the-art noble-metal-free HER electrocatalysts in 1.0 M KOH.

| Catalysts                                                | $\eta_{10}$<br>(mV) | Tafel slope<br>(mV dec <sup>-1</sup> ) | Reference |
|----------------------------------------------------------|---------------------|----------------------------------------|-----------|
| Ni <sub>3</sub> C/Ni@NF                                  | 16                  | 65.78                                  | This work |
| FeCoMnNi-MOF-74/NF                                       | 108                 | 72.89                                  | 6         |
| 0.4-Co <sub>2</sub> P/Ni <sub>x</sub> P <sub>y</sub> @NF | 81                  | 86                                     | 7         |
| Cr-Ni NHs                                                | 75                  | 72                                     | 8         |
| CoFeP TPAs/Ni                                            | 43                  | 30                                     | 9         |
| Ir@Ni/NiO                                                | 54.7                | 71.5                                   | 10        |
| CoP/NF                                                   | 41.1                | 65.3                                   | 11        |
| MnxFeyNi-MOF-74                                          | 99                  | 103.8                                  | 12        |
| V <sub>8</sub> C <sub>7</sub> /CoP                       | 119                 | 109                                    | 13        |
| Ni/C-H <sub>2</sub> -700                                 | 120                 | 121                                    | 14        |



**Table S2.** EIS parameters ( $R_s$  and  $R_{ct}$ ) of a series of catalysts at a controlled-potential of  $-0.066$  V vs. RHE for HER.

| Catalysts                   | $R_s$ ( $\Omega$ ) | $R_{ct}$ ( $\Omega$ ) |
|-----------------------------|--------------------|-----------------------|
| Ni <sub>3</sub> C/Ni@NF     | 1.335              | 0.92                  |
| Ni@NF                       | 1.169              | 2.19                  |
| Ni-MOF@NF                   | 1434               | 99.74                 |
| Ni <sub>3</sub> C/Ni@NF-0.5 | 1.916              | 5.19                  |
| Ni <sub>3</sub> C/Ni@NF-8   | 1.929              | 4.13                  |
| Ni <sub>3</sub> C/Ni@NF-350 | 1.087              | 2.93                  |
| Ni <sub>3</sub> C/Ni@NF-450 | 1.300              | 7.26                  |
| Ni <sub>3</sub> C/Ni@NF-550 | 1.159              | 9.35                  |
| Pt/C/NF                     | 1.085              | 1.68                  |
| Bare NF                     | 1.411              | 95.83                 |

**Table S3.** Comparison of double layer capacitance ( $C_{dl}$ ) and electrochemical active surface area (ECSA) of as-synthesized samples for HER.

| Catalysts                   | $C_{dl}$<br>(mF cm <sup>-2</sup> ) | ECSA<br>(cm <sup>2</sup> ) |
|-----------------------------|------------------------------------|----------------------------|
| Ni <sub>3</sub> C/Ni@NF     | 44.71                              | 1117.75                    |
| Ni@NF                       | 14.81                              | 370.25                     |
| Ni-MOF@NF                   | 0.59                               | 14.75                      |
| Ni <sub>3</sub> C/Ni@NF-0.5 | 20.44                              | 511.00                     |
| Ni <sub>3</sub> C/Ni@NF-8   | 31.03                              | 775.75                     |
| Ni <sub>3</sub> C/Ni@NF-350 | 20.02                              | 500.50                     |
| Ni <sub>3</sub> C/Ni@NF-450 | 10.92                              | 27.30                      |
| Ni <sub>3</sub> C/Ni@NF-550 | 8.41                               | 210.25                     |
| Bare NF                     | 1.03                               | 25.75                      |

**Table S4.** Comparison of Tafel slope and required overpotential at current density of 10 mA cm<sup>-2</sup> ( $\eta_{10}$ ) for Ni<sub>3</sub>C/Ni@NF with many of reported state-of-the-art noble-metal-free OER electrocatalysts in 1.0 M KOH.

| Catalysts                                         | $\eta_{10}$<br>(mV) | Tafel slope<br>(mV dec <sup>-1</sup> ) | Reference |
|---------------------------------------------------|---------------------|----------------------------------------|-----------|
| Ni <sub>3</sub> C/Ni@NF                           | 268                 | 90.43                                  | This work |
| VOB-Co <sub>3</sub> O <sub>4</sub> /NF            | 315                 | 112.5                                  | 3         |
| Co <sub>3</sub> O <sub>4</sub> @Ni <sub>2</sub> P | 270                 | 67                                     | 15        |
| DLD-FeCoP@CNT                                     | 286                 | 39.6                                   | 16        |
| CoNi/NC-YS                                        | 292                 | 53.8                                   | 17        |
| NiFe-S-13@CNFs                                    | 270                 | 44.4                                   | 18        |
| Mo <sub>0.2</sub> -Co-O NSs                       | 276                 | 63                                     | 19        |
| Fe <sub>0.6</sub> Co <sub>0.4</sub> P@O           | 346                 | 36                                     | 20        |
| Ni-CoP-2                                          | 306                 | 50                                     | 21        |
| Ni/Fe <sub>3</sub> O <sub>4</sub>                 | 296                 | 61                                     | 22        |

**Table S5.** EIS parameters ( $R_s$  and  $R_{ct}$ ) of a series of catalysts at a controlled-potential of 1.574 V vs. RHE for OER.

| Catalysts         | $R_s$ ( $\Omega$ ) | $R_{ct}$ ( $\Omega$ ) |
|-------------------|--------------------|-----------------------|
| $Ni_3C/Ni@NF$     | 1.811              | 3.48                  |
| Ni@NF             | 1374               | 5.61                  |
| $Ni_3C/Ni@NF-0.5$ | 1.353              | 5.74                  |
| $Ni_3C/Ni@NF-8$   | 1.263              | 5.66                  |
| $Ni_3C/Ni@NF-350$ | 0.9876             | 6.76                  |
| $Ni_3C/Ni@NF-450$ | 0.9543             | 6.31                  |
| $Ni_3C/Ni@NF-550$ | 1.478              | 11.80                 |
| $RuO_2/NF$        | 1.226              | 2.95                  |
| Bare NF           | 1.428              | 46.48                 |

**Table S6.** Comparison of double layer capacitance ( $C_{dl}$ ) and electrochemical active surface area (ECSA) of as-synthesized samples for OER.

| Catalysts                   | $C_{dl}$<br>(mF cm <sup>-2</sup> ) | ECSA<br>(cm <sup>2</sup> ) |
|-----------------------------|------------------------------------|----------------------------|
| Ni <sub>3</sub> C/Ni@NF     | 63.95                              | 1598.75                    |
| Ni@NF                       | 33.29                              | 832.25                     |
| Ni <sub>3</sub> C/Ni@NF-0.5 | 28.38                              | 709.50                     |
| Ni <sub>3</sub> C/Ni@NF-8   | 14.53                              | 363.25                     |
| Ni <sub>3</sub> C/Ni@NF-350 | 53.09                              | 1327.25                    |
| Ni <sub>3</sub> C/Ni@NF-450 | 30.29                              | 757.25                     |
| Ni <sub>3</sub> C/Ni@NF-550 | 15.84                              | 396.00                     |
| Bare NF                     | 5.36                               | 134.00                     |

## References

- 1 C. Feng, M. Lv, J. Shao, H. Wu, W. Zhou, S. Qi, C. Deng, X. Chai, H. Yang, Q. Hu and C. He, *Adv. Mater.*, 2023, **35**, 2305598.
- 2 X. Li, H. Zhang, Q. Hu, W. Zhou, J. Shao, X. Jiang, C. Feng, H. Yang and C. He, *Angew. Chem. Int. Ed. Engl.*, 2023, **62**, 202300478.
- 3 H. F. Yuan, S. M. Wang, Z. Z. Ma, M. Kundu, B. Tang, J. P. Li and X. G. Wang, *Chem. Eng. J.*, 2021, **404**, 126474.
- 4 S. Wang, Y. Zhang, X. Deng, Z. Ma, R. Cheng, Z. Wan, J. Li and X. Wang, *J. Mater. Chem. A*, 2023, **11**, 5222–5232.
- 5 Q. Hu, S. Qi, Q. Huo, Y. Zhao, J. Sun, X. Chen, M. Lv, W. Zhou, C. Feng, X. Chai, H. Yang and C. He, *J. Am. Chem. Soc.*, 2023, **146**, 2967–2976.
- 6 M. Zhang, W. Xu, T. Li, H. Zhu and Y. Zheng, *Inorg. Chem.*, 2020, **59**, 15467–15477.
- 7 H. Liu, Y. Zhang, R. Ge, J. M. Cairney, R. Zheng, A. Khan, S. Li, B. Liu, L. Dai and W. Li, *Appl. Energy*, 2023, **349**, 121582.
- 8 J. Kim, H. Jung, S. M. Jung, J. Hwang, D. Y. Kim, N. Lee, K. S. Kim, H. Kwon, Y. T. Kim, J. W. Han and J. K. Kim, *J. Am. Chem. Soc.*, 2020, **143**, 1399–1408.
- 9 L. Zhang, X. Wang, A. Li, X. Zheng, L. Peng, J. Huang, Z. Deng, H. Chen and Z. Wei, *J. Mater. Chem. A*, 2019, **7**, 17529–17535.
- 10 D. Li, L. Ding, Q. Zhao, F. Yang and S. Zhang, *Appl. Energy*, 2024, **356**, 122369.
- 11 J. Liu, Y. Gao, X. Tang, K. Zhan, B. Zhao, B. Y. Xia and Y. Yan, *J. Mater. Chem. A*, 2020, **8**, 19254–19261.
- 12 W. Zhou, Z. Xue, Q. Liu, Y. Li, J. Hu and G. Li, *ChemSusChem*, 2020, **13**, 5647–5653.
- 13 L. S. Wu, M. T. Zhang, Z. H. Wen and S. Q. Ci, *Chem. Eng. J.*, 2020, **399**, 125728.
- 14 D. Yan, L. Zhang, Z. Chen, W. Xiao and X. Yang, *Acta Phys. -Chim. Sin.*, 2020, **37**, 2009054.
- 15 X. Hu, T. Yang, Z. Yang, Z. Li, R. Wang, M. Li, G. Huang, B. Jiang, C. Xu and F. Pan, *J. Mater. Sci. Technol.*, 2022, **115**, 19–28.
- 16 B. Wang, Y. Chen, Q. Wu, Y. Lu, X. Zhang, X. Wang, B. Yu, D. Yang and W. Zhang, *J. Mater. Sci. Technol.*, 2021, **74**, 11–20.
- 17 G. Hou, X. Jia, H. Kang, X. Qiao, Y. Liu, Y. Li, X. Wu and W. Qin, *Appl. Catal. B*, 2022, **315**,

121551.

18 Y. T. Li, W. Ma, J. Wang and Q. Zhong, *J. Mater. Chem. A*, 2022, **10**, 24388–24397.

19 C. He, X. Hu, J. Wang, L. Bu, C. Zhan, B. Xu, L. Li, Y. Li and X. Huang, *Sci. China Mater.*, 2022, **65**, 3470–3478.

20 H. X. Chen, H. Xu, Z. R. Song, Y. Liu, H. Cui and J. K. Gao, *Rare Metals*, 2022, **42**, 155–164.

21 M. Sun, R. Ge, J. Yang, J. Qu, Y. Li, M. Zhu, J. M. Cairney, R. Zheng, S. Li and W. Li, *Appl. Energy*, 2022, **326**, 119999.

22 G. Liu, R. Yao, Y. Zhao, M. Wang, N. Li, Y. Li, X. Bo, J. Li and C. Zhao, *Nanoscale*, 2018, **10**, 3997–4003.
